# Supplementary material for: Suzuki homo-coupling reaction based fluorescent sensors for monosaccharides
Source: Royal Society of Chemistry journal article supplement (doi:10.1039/c4ra07331b), 2014-07-30
Supplement: c4ra07331b1.pdf [file c4ra07331b1.pdf]

Supporting Information  
For

**Suzuki Homo-coupling Reaction Based Fluorescent Sensors for  
Monosaccharides**

Su-Ying Xu,<sup>\*a</sup> Hui-Chen Wang,<sup>a</sup> Steve Flower,<sup>a</sup> John S. Fossey,<sup>b</sup> Yun-Bao Jiang<sup>\*c</sup> and Tony  
D. James <sup>\*a</sup>

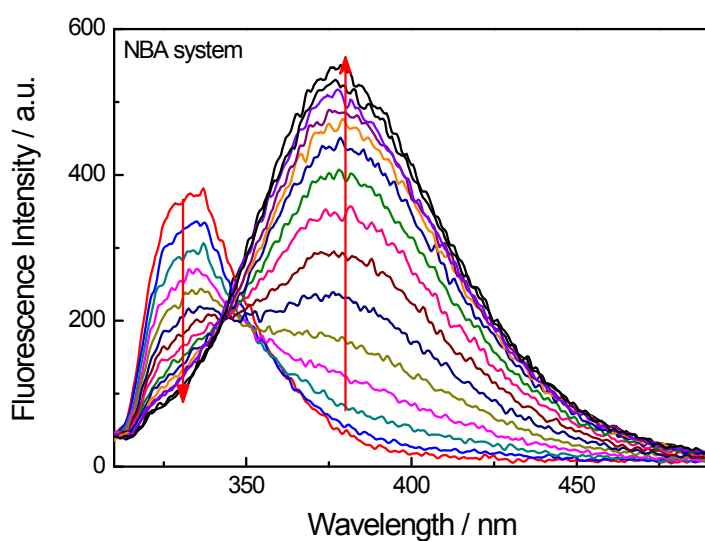

**S 1** Fluorescent spectra changes of compound **1b** along with time.  $[1b] = 3 \times 10^{-6} \text{ M}$ ,  $[Pd] = 1 \times 10^{-5} \text{ M}$ , spectra were collected every two minutes

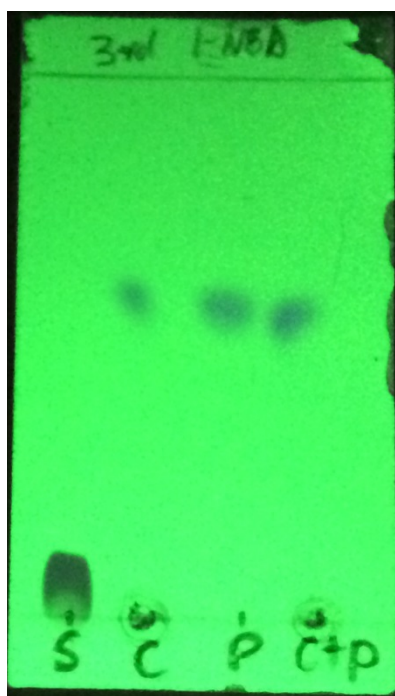

**S 2** TLC results of Suzuki Homocoupling reaction under UV lamp (254 nm). S: starting material (naphthalene-1-boronic acid) ; C: reaction mixture; P: pure product (1,1'- binaphthyl); C + P: reaction mixture and pure product

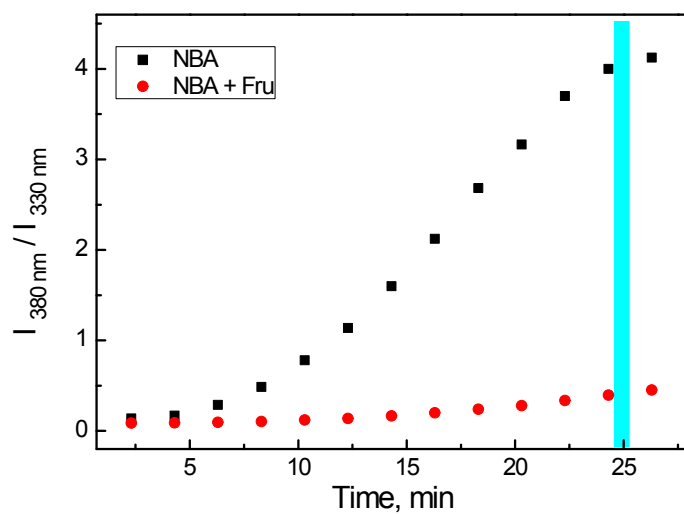

**S 3** Ratio of fluorescent intensities at 380 nm to 330 nm *versus* time. [**1b**] =  $3 \times 10^{-6}$  M, [Pd] =  $1 \times 10^{-5}$  M, spectra were collected every two minutes

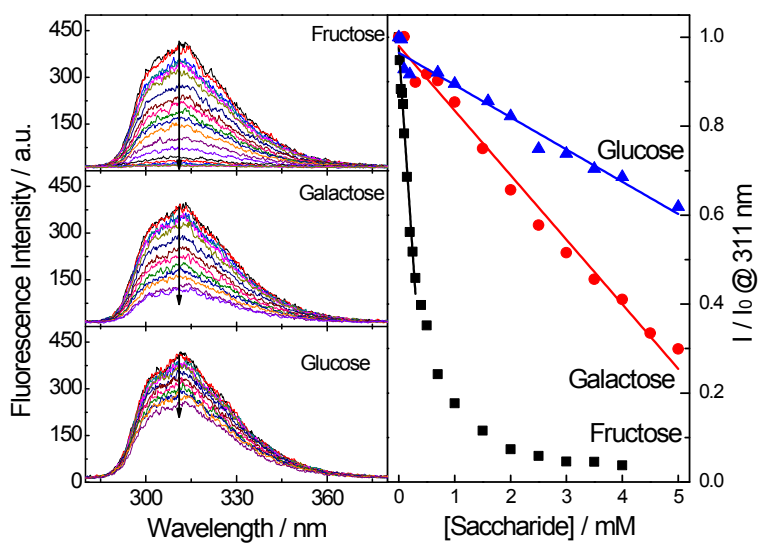

**S 4** Saccharide titration results of our previous work<sup>1</sup>

(1) Xu, S.-Y.; Ruan, Y.-B.; Luo, X.-X.; Gao, Y.-F.; Zhao, J.-S.; Shen, J.-S.; Jiang, Y.-B. *Chem. Commun.* **2010**, 46, 5864.
